# Supplementary material
Source: publisher figshare collection journal article supplement (https://frontiersin.figshare.com/ndownloader/files/17562518)
Supplement: Supplementary file [file 17562518]

# **A Novel Drug Resistance Mechanism: Genetic Loss of Xeroderma Pigmentosum Complementation Group C (*XPC*) Enhances Glycolysis-Mediated Drug Resistance in DLD-1 Colon Cancer Cells**

Yu Han<sup>1</sup>, Yuan Qing Qu<sup>1</sup>, Simon Wing Fai Mok<sup>1</sup>, Juan Chen<sup>2</sup>, Cheng Lai Xia<sup>3</sup>, Hu Qiang He<sup>1</sup>, Zheng Li<sup>1</sup>, Wei Zhang<sup>1</sup>, Cong Ling Qiu<sup>1</sup>, Liang Liu<sup>1\*</sup>, Betty Yuen Kwan Law<sup>1\*</sup> and Vincent Kam Wai Wong<sup>1\*</sup>

<sup>1</sup>State Key Laboratory of Quality Research in Chinese Medicine, Macau University of Science and Technology, Avenida Wai Long, Taipa, Macau, China

<sup>2</sup>The Key Laboratory of Molecular Biology of Infectious Diseases designated by the Chinese Ministry of Education, Chongqing Medical University

<sup>3</sup>Foshan Maternal and Child Health Research Institute, Foshan Women and Children's Hospital Affiliated to Southern Medical University, Foshan 528000, China

\*Corresponding authors: Prof. Liang Liu, Dr. Betty Yuen Kwan Law, and Dr. Vincent Kam Wai Wong

Address correspondence: State Key Laboratory of Quality Research in Chinese Medicine, Macau University of Science and Technology, Avenida Wai Long, Taipa, Macau, China

E-mail address: lliu@must.edu.mo (L Liu), yklaw@must.edu.mo (BYK Law); bowaiwong@gmail.com (VKW Wong)

## Supplementary Figures

Figure S1

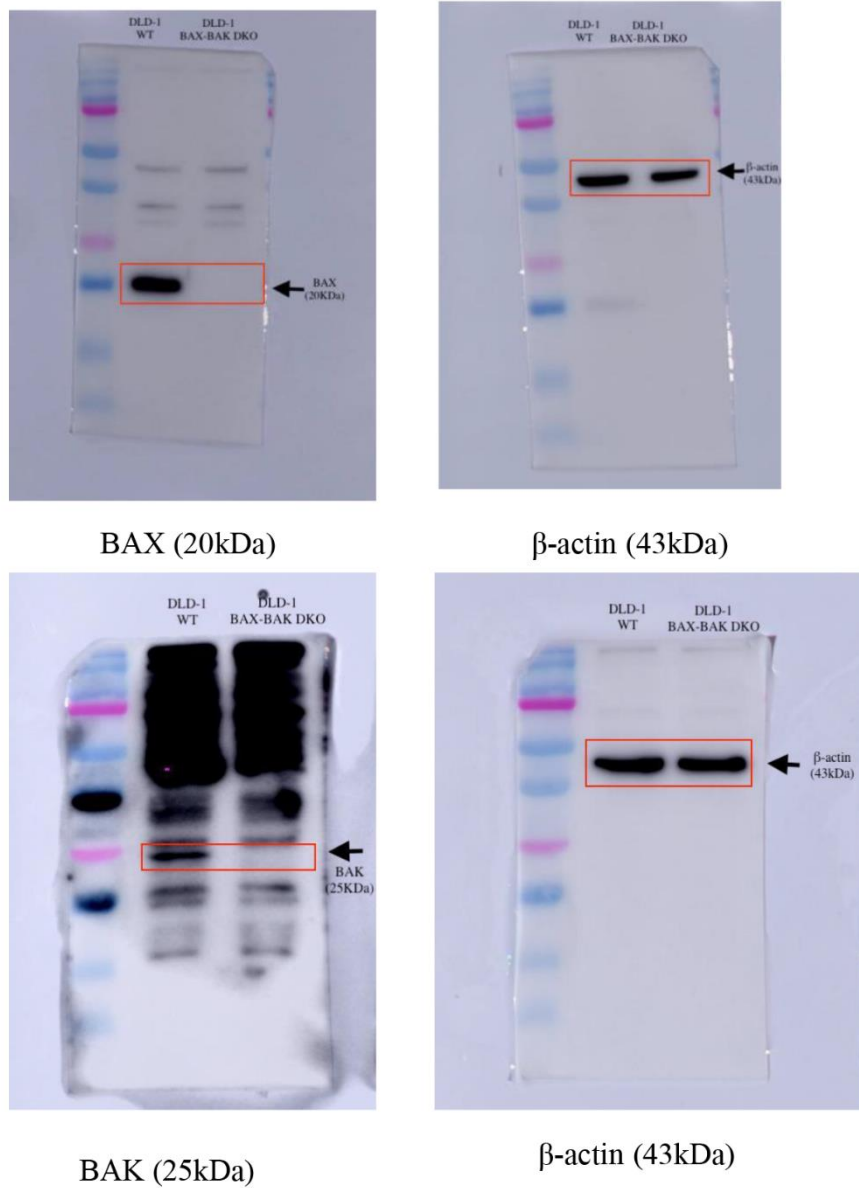

**Figure 1** Study of BAX and BAK expression level in DLD-1 colon cancer cells. The full-length images of Western blot are shown in **Figure S1**.

Figure S2

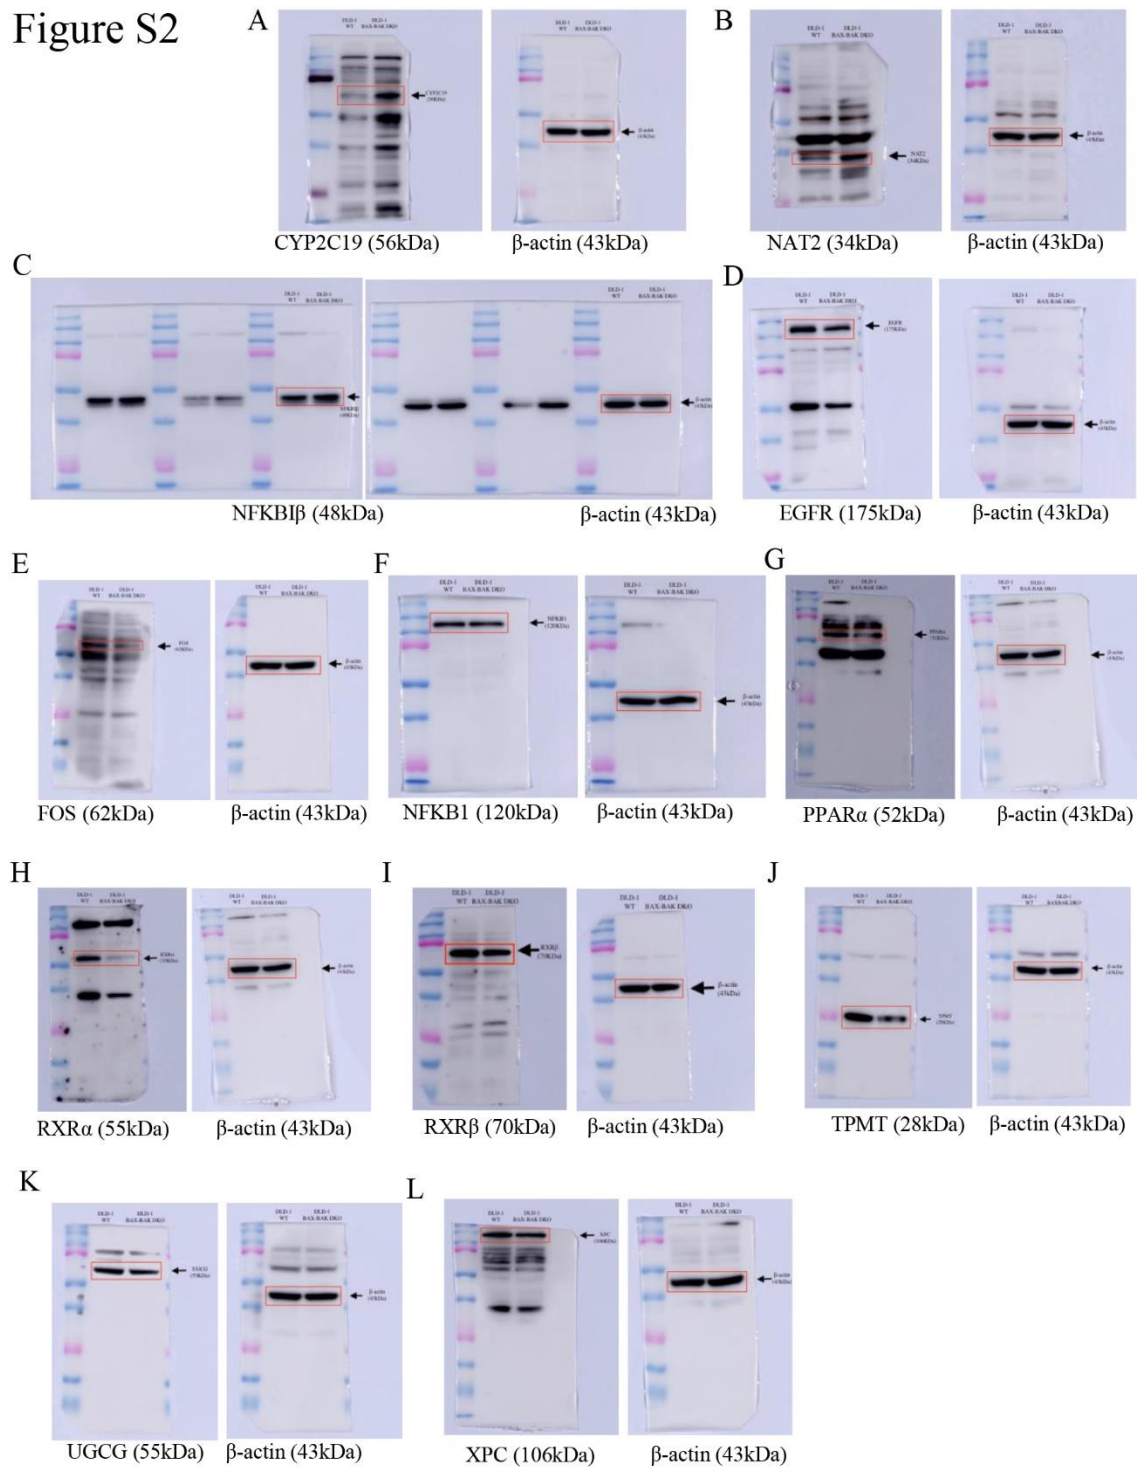

**Figure 3** Western blot analysis of relevant proteins expression level in DLD-1 WT and DLD-1 BAX-BAK DKO cells. The full-length images of Western blot are shown in **Figure S2**.

Figure S3

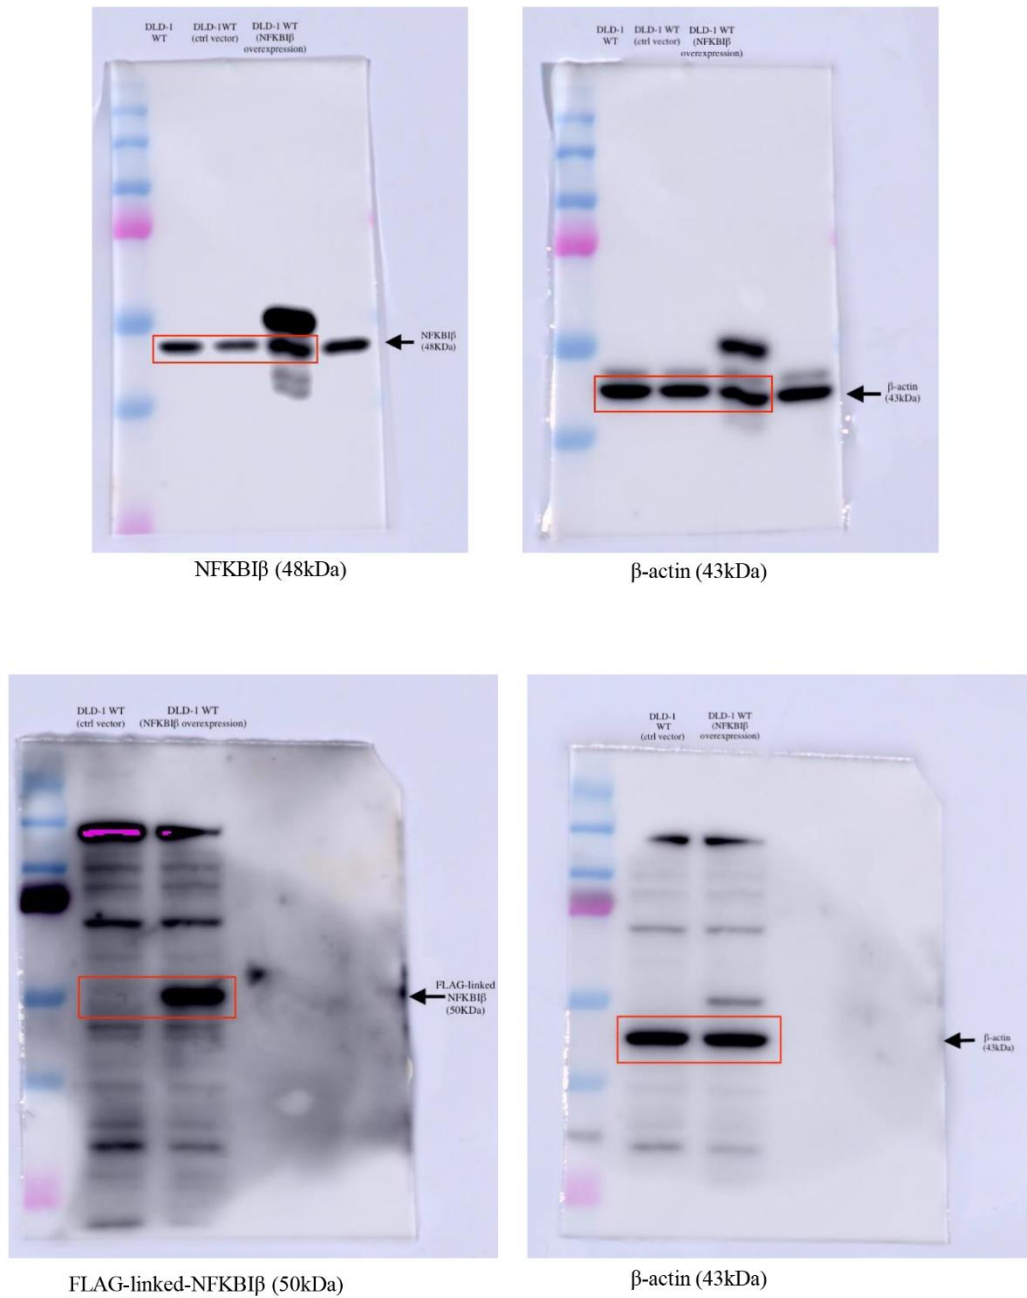

**Figure 4** Expression level of specific gene or protein in DLD-1 WT cells after siRNA-mediated gene silencing or protein overexpression. The full-length images of Western blot are shown in **Figure S3**.

Figure S4

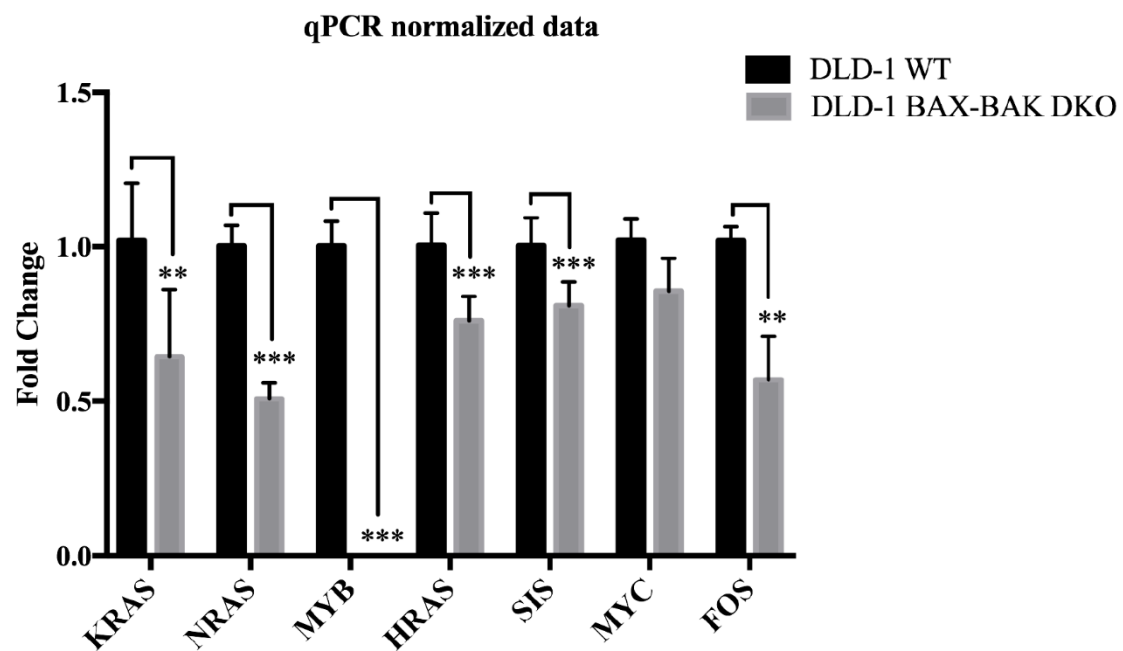

**Figure S4.** The normalized expression level (compared with DLD-1 WT cells) of inherent mutated oncogenes: MYC, KRAS, NRAS, MYB, HRAS, SIS and FOS in DLD-1 BAX/BAK double-knockout cells.
